# Supplementary material for: The first dye-sensitized solar cell with p-type LaOCuS nanoparticles as a photocathode
Source: Royal Society of Chemistry journal article supplement (doi:10.1039/c5ra07859h), 2015-01-01
Supplement: c5ra07859h1.pdf [file c5ra07859h1.pdf]

## First dye-sensitized solar cell with p-type LaOCuS nanoparticles as photocathode

Adèle Renaud<sup>a</sup>, Laurent Cario<sup>a</sup>, Yann Pellegrin<sup>b</sup>, Errol Blart<sup>b</sup>, Mohammed Boujtita<sup>b</sup>, Fabrice Odobel<sup>b</sup>, Stéphane Jobic<sup>a</sup>

5 Received (in XXX, XXX) Xth XXXXXXXXXX 200X, Accepted Xth XXXXXXXXXX 200X

DOI: 10.1039/b000000x

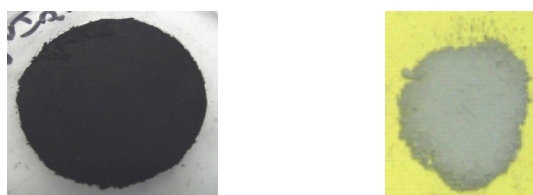

10

**Figure S1.** Photographs of NiO (left) and LaOCuS (right) when prepared as nanoparticles after A. Renaud et al.<sup>1</sup> and C. Doussier-Brochard et al.<sup>2</sup>, respectively.

15

20

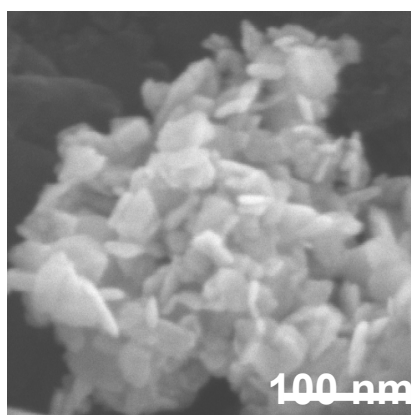

25

**Figure S2.** SEM image of LaOCuS nanoparticles obtained on a JEOL7600F

30

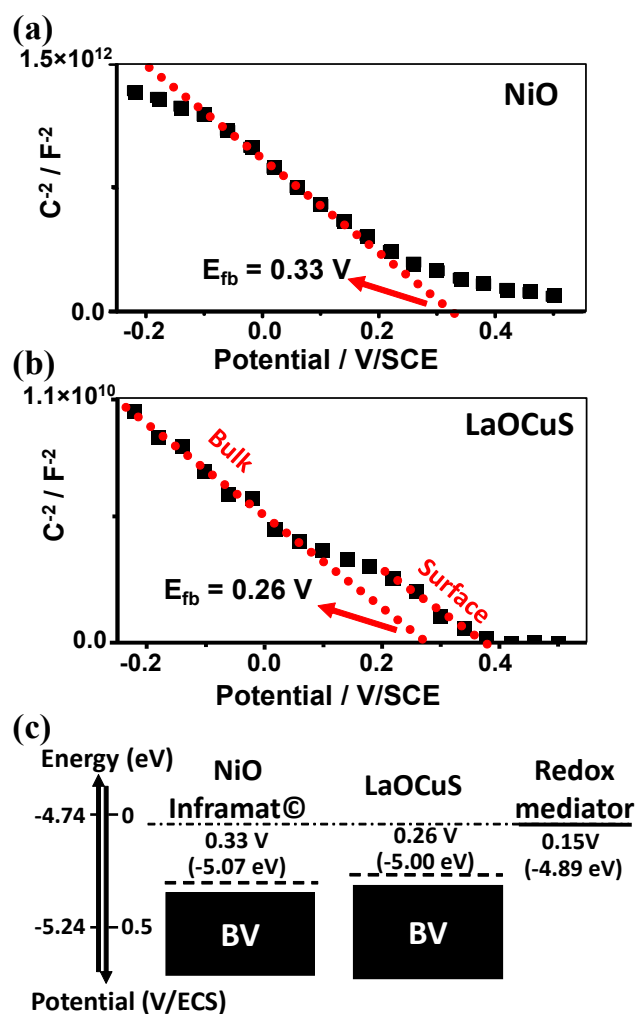

5 **Figure S3.** Mott-Schottly plots for Inframat® NiO (a) and LaOCuS (b) pellets sintered at 450°C in air and under N<sub>2</sub> atmosphere, respectively (electrolyte : LiClO<sub>4</sub> in water; pH= 6.3). Schematic representation of the evolution of the flat band potentials going from NiO to LaOCuS (c).

10

15 **Table S1.** Photovoltaic performances of a DSSC device constructed with Inframat®NiO as p-SC sensitized with dye PMI-NDI and using the cobalt electrolyte.

| NiO                  |               |                                 |        |            |
|----------------------|---------------|---------------------------------|--------|------------|
| Dye/ Redox. mediator | $V_{oc}$ (mV) | $J_{sc}$ (mA.cm <sup>-2</sup> ) | FF (%) | $\eta$ (%) |
| PMI-NDI/Co           | 285           | 1.2                             | 41     | 0.141      |

20

---

References:

1. A. Renaud, B. Chavillon, L. Cario, L. Le Pleux, N. Szuwarski, Y. Pellegrin, E. Blart, E. Gautron, F. Odobel, S. Jobic, Origin of the black color of NiO used as photocathode in p-type dye sensitized solar cells, *J. Phys. Chem. C*, 2013, 117, 22478-22483
- 5 2. C. Doussier-Brochard, B. Chavillon, L. Cario, S. Jobic, Synthesis of p-type transparent LaOCuS nanoparticles via soft chemistry, *Inorg. Chem.*, 2010, 49, 3074-3076

10
